# Supplementary material for: Thermodynamic and computational analyses reveal the functional roles of the galloyl group of tea catechins in molecular recognition
Source: PubMed Central journal article supplement (PMC6181319; doi:10.1371/journal.pone.0204856), 2018-10-11
Supplement: pone.0204856.s011.pdf [file pone.0204856.s011.pdf]

**S1 Table. Thermal stabilities and binding affinities of HSA and HSA–catechin complexes <sup>a</sup>**

| Compound | $T_m$ (°C)     | $\Delta T_m$ (°C) | $K_D$ ( $\mu\text{M}$ ) |
|----------|----------------|-------------------|-------------------------|
| HSA      | $68.6 \pm 0.1$ | —                 | —                       |
| HSA–EGCg | $71.4 \pm 0.3$ | 2.7               | $2.2 \pm 0.3$           |
| HSA–ECg  | $72.2 \pm 0.1$ | 3.5               | $1.1 \pm 0.1$           |
| HSA–GCg  | $73.3 \pm 0.2$ | 4.6               | $8.8 \pm 3.4$           |
| HSA–Cg   | $71.7 \pm 0.1$ | 3.1               | $3.5 \pm 0.5$           |
| HSA–EGC  | $68.8 \pm 0.2$ | 0.2               | $20 \pm 16$             |
| HSA–EC   | $68.7 \pm 0.3$ | 0.0               | $49 \pm 18^b$           |
| HSA–GC   | $69.3 \pm 0.3$ | 0.7               | $52 \pm 16^b$           |
| HSA–C    | $68.5 \pm 0.1$ | –0.1              | $5.0 \pm 8.6$           |

<sup>a</sup> Each value is the average of at least three independent measurements.

<sup>b</sup> The binding stoichiometry was fixed to  $N = 1$ .
