# Supplementary material for: Thermodynamic and computational analyses reveal the functional roles of the galloyl group of tea catechins in molecular recognition
Source: PubMed Central journal article supplement (PMC6181319; doi:10.1371/journal.pone.0204856), 2018-10-11
Supplement: pone.0204856.s012.pdf [file pone.0204856.s012.pdf]

**S2 Table. Binding affinities of catechins and EtGa for HSA in the presence and absence of NaCl**

| Compound | NaCl (M) | $K_D$ ( $\mu$ M) |
|----------|----------|------------------|
| EGCg     | 0        | 2.2              |
|          | 0.2      | 27.3             |
| ECg      | 0        | 1.1              |
|          | 0.2      | 3.7              |
| GCg      | 0        | 8.8              |
|          | 0.2      | 18.6             |
| EGC      | 0        | 19.5             |
|          | 0.2      | 6.7              |
| EC       | 0        | 48.7             |
|          | 0.2      | 0.7              |
| EtGa     | 0        | 45.7             |
|          | 0.2      | 16.6             |
