# Supplementary material for: Thermodynamic and computational analyses reveal the functional roles of the galloyl group of tea catechins in molecular recognition
Source: PubMed Central journal article supplement (PMC6181319; doi:10.1371/journal.pone.0204856), 2018-10-11
Supplement: pone.0204856.s013.pdf [file pone.0204856.s013.pdf]

**S3 Table. Temperature dependence of binding parameters for the interaction of EGCg and EGCg-3''-O-Me with HSA**

| Compound      | Temperature (K) | $N$     | $K_D$ ( $\mu\text{M}$ ) | $\Delta H$ ( $\text{kcal mol}^{-1}$ ) | $-T\Delta S$ ( $\text{kcal mol}^{-1}$ ) | $\Delta G$ ( $\text{kcal mol}^{-1}$ ) | $\Delta C_p$ ( $\text{cal mol}^{-1} \text{K}^{-1}$ ) |
|---------------|-----------------|---------|-------------------------|---------------------------------------|-----------------------------------------|---------------------------------------|------------------------------------------------------|
| EGCg          | 288             | 1.1±0.1 | 2.3±0.1                 | -3.9±0.5                              | -3.5±0.5                                | -7.4±0.1                              | -148 <sup>a</sup>                                    |
|               | 293             | 1.1±0.1 | 2.1±0.7                 | -4.7±0.7                              | -2.9±0.8                                | -7.6±0.7                              |                                                      |
|               | 298             | 1.1±0.1 | 2.0±0.4                 | -5.7±0.7                              | -2.1±0.6                                | -7.8±0.4                              |                                                      |
|               | 303             | 1.1±0.1 | 2.1±0.8                 | -6.1±0.2                              | -1.8±0.3                                | -7.9±0.8                              |                                                      |
| EGCg-3''-O-Me | 288             | 1.1±0.1 | 0.19±0.04               | -5.7±1.2                              | -3.2±1.2                                | -8.9±0.1                              | -195 <sup>a</sup>                                    |
|               | 293             | 1.0±0.1 | 0.12±0.02               | -6.9±1.7                              | -2.4±1.7                                | -9.3±0.1                              |                                                      |
|               | 298             | 1.0±0.1 | 0.14±0.02               | -7.4±0.9                              | -1.9±0.9                                | -9.4±0.1                              |                                                      |
|               | 303             | 1.1±0.1 | 0.16±0.04               | -8.7±0.5                              | -0.7±0.4                                | -9.4±0.2                              |                                                      |

<sup>a</sup>The  $\Delta C_p$  value was obtained between 288 and 303
