# Supplementary material for: Thermodynamic and computational analyses reveal the functional roles of the galloyl group of tea catechins in molecular recognition
Source: PubMed Central journal article supplement (PMC6181319; doi:10.1371/journal.pone.0204856), 2018-10-11
Supplement: pone.0204856.s014.pdf [file pone.0204856.s014.pdf]

**S4 Table.  $\Delta G$  and interface scores for the interaction of catechins and EtGa with HSA**

| Compound      | $\Delta G$ (kcal mol <sup>-1</sup> ) | Interface score |
|---------------|--------------------------------------|-----------------|
| EGCg          | -7.7                                 | -16.4           |
| ECg           | -8.1                                 | -16.5           |
| GCg           | -6.9                                 | -16.6           |
| Cg            | -7.4                                 | -15.6           |
| EGC           | -6.3                                 | -12.8           |
| EC            | -5.8                                 | -12.2           |
| GC            | -5.8                                 | -12.8           |
| C             | -7.1                                 | -13.8           |
| EtGa          | -5.9                                 | -11.9           |
| EGCg-3'-O-Me  | -7.7                                 | -15.8           |
| EGCg-4'-O-Me  | -7.9                                 | -16.4           |
| EGCg-3''-O-Me | -9.4                                 | -17.6           |
| EGCg-4''-O-Me | -8.2                                 | -16.3           |
